# Supplementary material
Source: publisher figshare collection journal article supplement (https://diabetesjournals.figshare.com/ndownloader/files/22377567)
Supplement: Supplementary file 1 [file 22377567]

**Table S3. Summary of pairwise comparisons of RNAseq datasets performed in this study.**

| **Variable**  **analyzed** | **Samples** | **Genes**  **affected** | **Figure** |
| --- | --- | --- | --- |
| Excitotoxicity | RC-*Abcc8* KO males and females (n=8) vs. RC-WT males and females (n=8) | 7393 | 2 |
| HFD | HFD-WT males and females (n=7) vs.  RC-WTmales and females (n=8) | 2372 | 3 |
| Excitotoxicity  and HFD | HFD-*Abcc8*KO males and females (n=8) vs. RC-WT males and females (n=8) | 8836 | 4 |
| Sex – WT | RC-WT males (n=4)  vs. RC-WT females (n=4) | 140 | S11 |
| Sex – HFD | HFD-WT males (n=4) vs.  HFD-WT females (n=3) | 2618 | S11 |
| Sex – excitotoxicity | RC-*Abcc8*KO males (n=4) vs.  RC-*Abcc8*KO females (n=4) | 36 | S11 |
| Sex -  excitotoxicity and  HFD | HFD-*Abcc8*KO males (n=5) vs.  HFD-*Abcc8*KO females (n=3) | 125 | S11 |

Using the 31 RNA-seq datasets collected in this study, we performed a three different pairwise differential expression analyses. All mice contained a single *Ins2Apple* allele. The number of affected (dysregulated) genes based on a padj.< 0.05. HFD, high fat diet. RC, regular chow. WT, wild type. KO, knockout.
